# Supplementary material
Source: MDPI journal article supplement (https://www.mdpi.com/1424-8247/14/11/1099)

## Supplementary Materials

**Title: A rational design of  $\alpha$ -helix-shaped peptides employing the hydrogen-bond surrogate approach: a modulation strategy for Ras-RasGRF1 interaction in neuropsychiatric disorders**

|              |                                                        |      |
|--------------|--------------------------------------------------------|------|
|              |                                                        | 1198 |
| Homo sapiens | 1184 – PPCVPYLGMYLTDL <b>A</b> FIEEGTPNYTEDGLVN – 1214 |      |
| Mus musculus | 1173 – PPCVPYLGMYLTDL <b>V</b> FIEEGTPNYTEDGLVN – 1203 |      |
|              |                                                        | 1187 |

**Figure S1.** FASTA sequence alignment between RasGRF1 interacting region from two different organisms (*homo sapiens* and *mus musculus*)

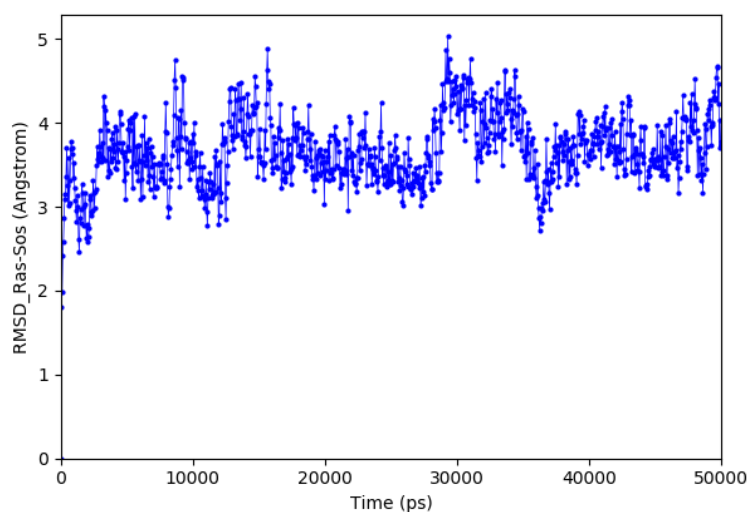

**Figure S2.** RMSD plot of MD simulation performed on Ras-Sos complex (PDB 1XD2)

**Table S1.** Plots of the H-bonds established between Ras and Sos during the MD simulation.

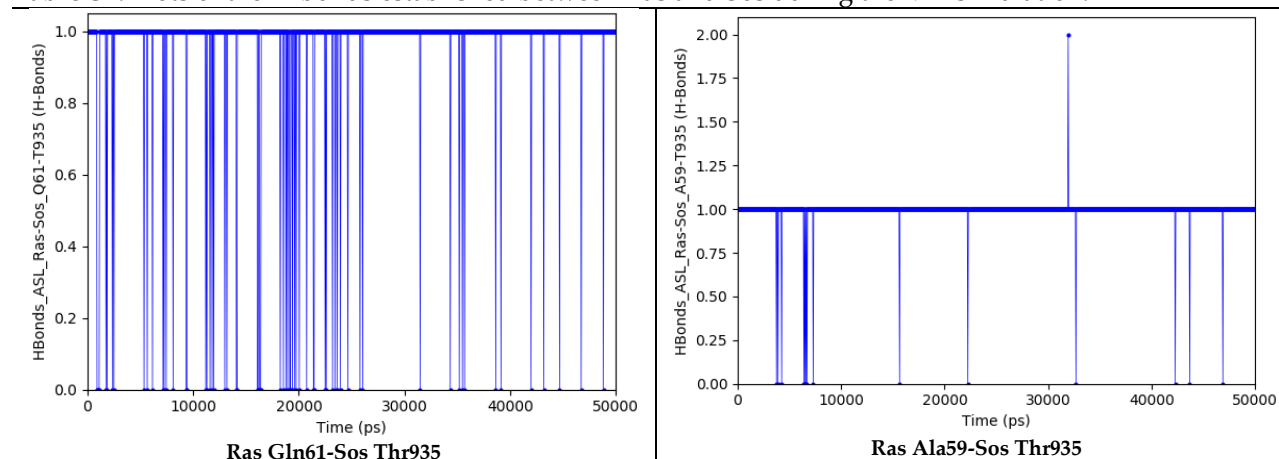

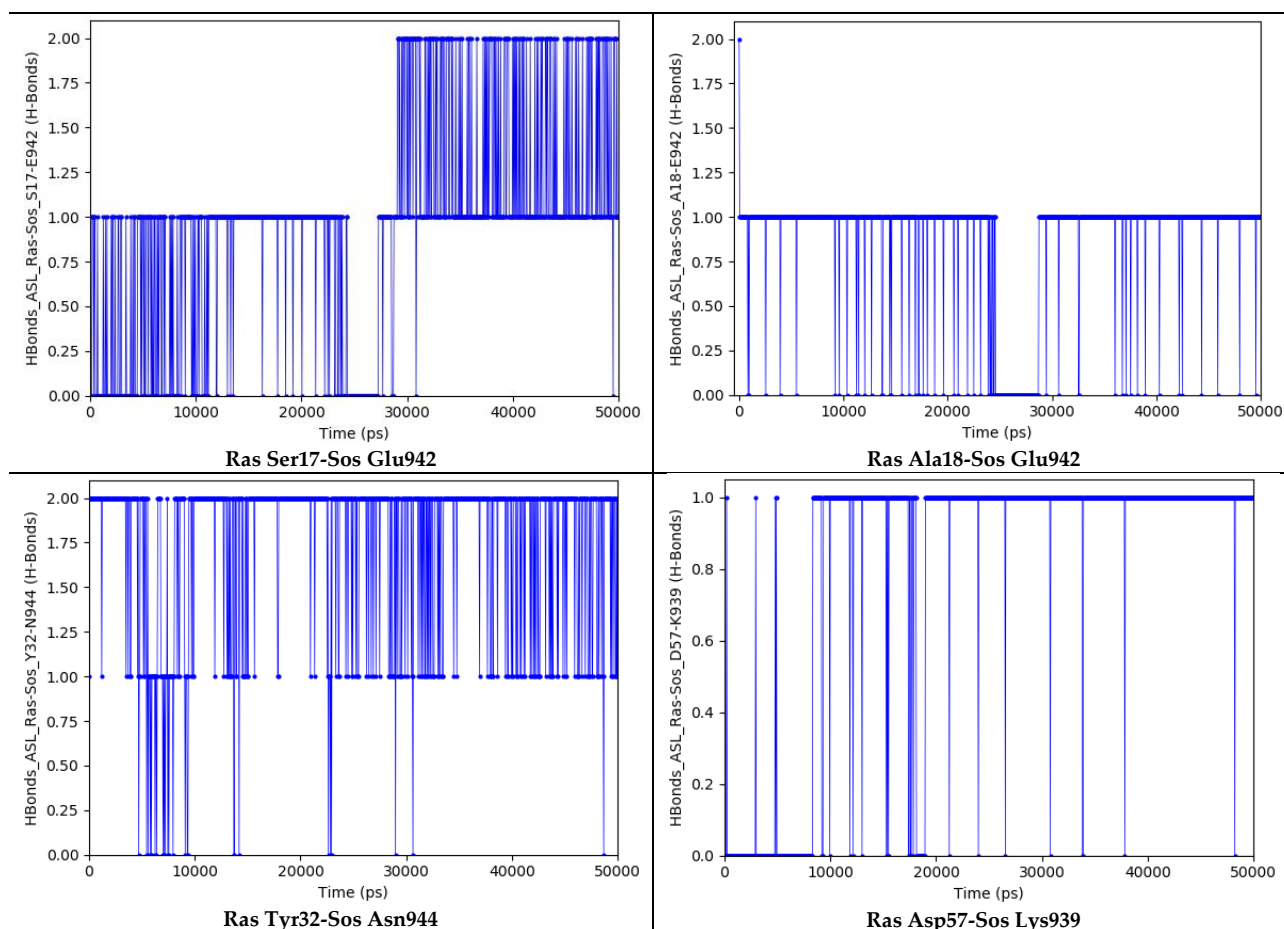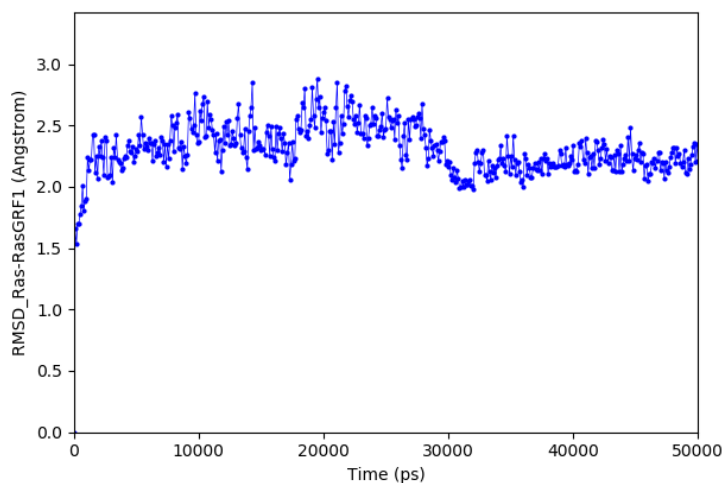

**Figure S3.** RMSD plot of MD simulation performed on Ras-RasGRF1 complex

**Table S2.** Plots of the H-bonds established between Ras and RasGRF1 during the MD simulation.

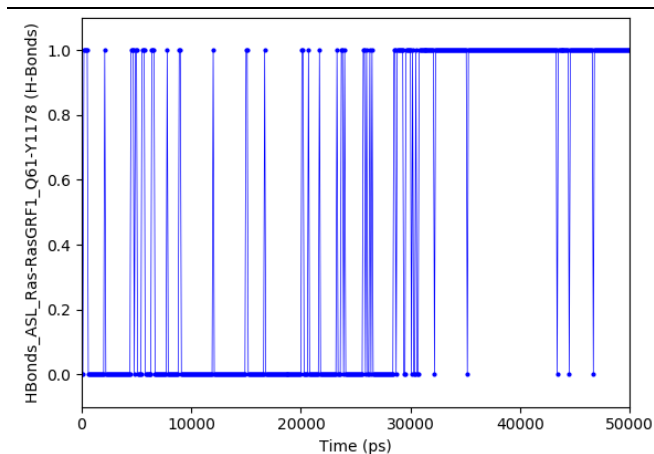

**Ras Gln61-RasGRF1 Tyr1178**

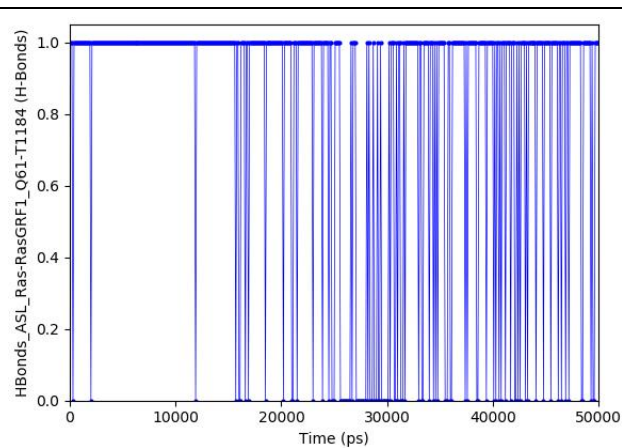

**Ras Gln61-RasGRF1 Thr1184**

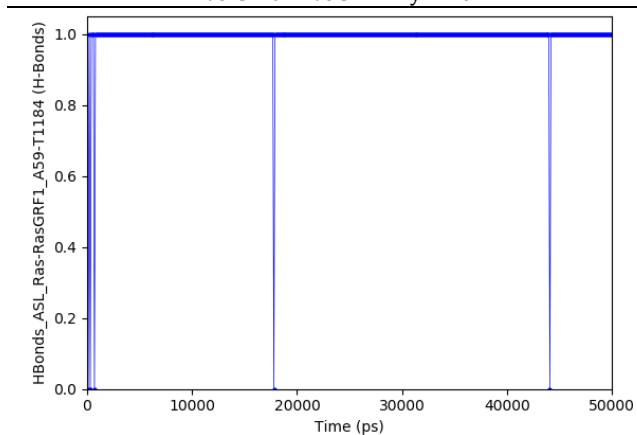

**Ras Ala59-RasGRF1 Thr1184**

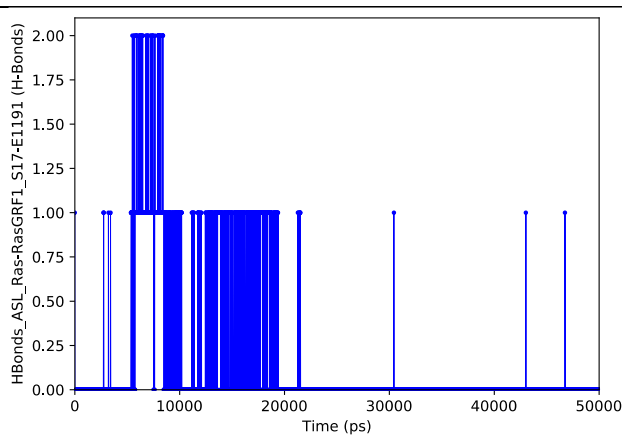

**Ras Ser17-RasGRF1 Glu1191**

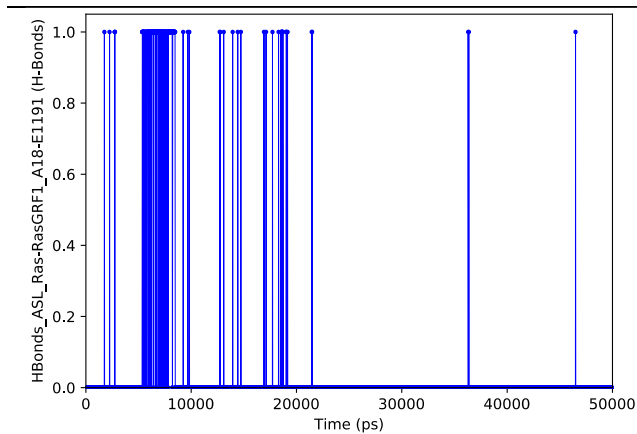

**Ras Ala18-RasGRF1 Glu1191**

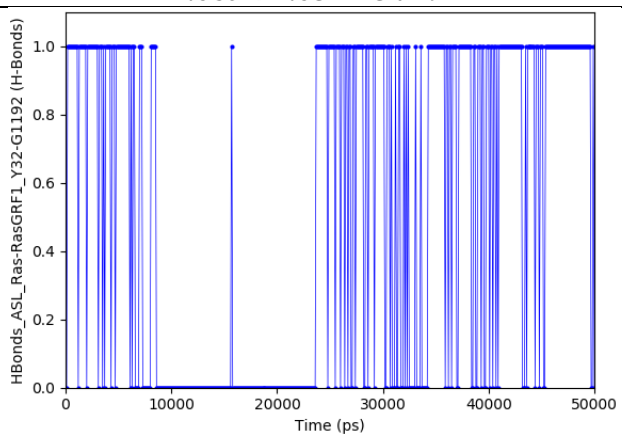

**Ras Tyr32-RasGRF1 Gly1192**

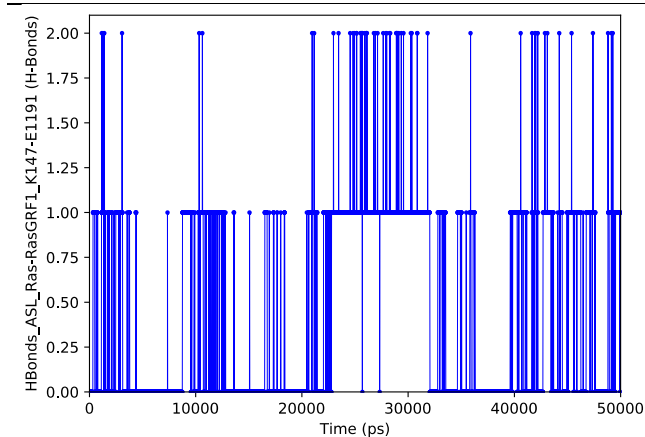

**Ras Lys147-RasGRF1 Glu1191**

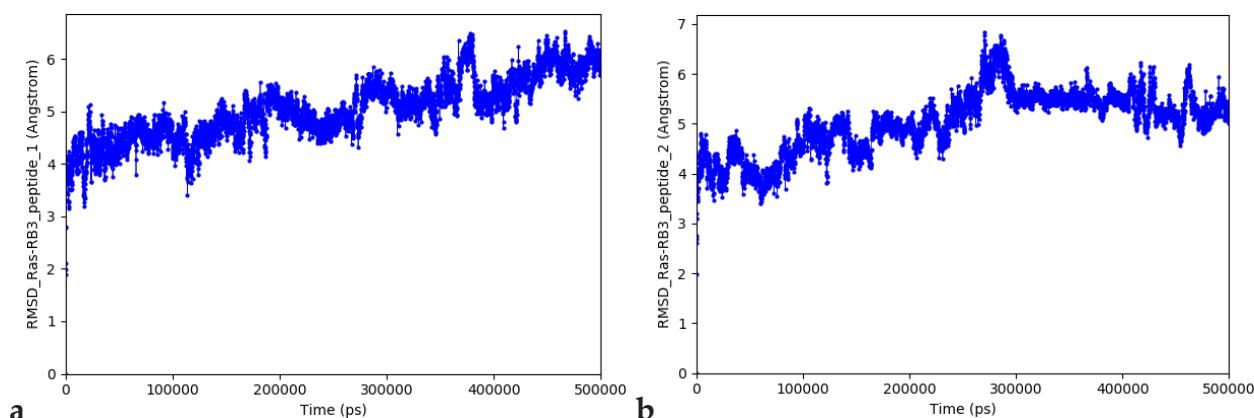

**Figure S4.** RMSD plots of first (a) and second (b) MD simulations performed on Ras-RB3 peptide complex

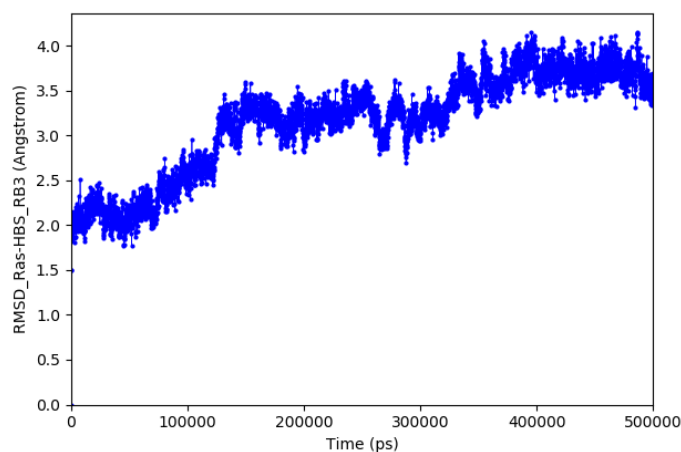

**Figure S5.** RMSD plot of MD simulation performed on Ras protein in complex with 3<sub>10</sub>-HBS RB3 peptide

**Table S3.**  $\Delta G_{\text{binding}}$  average values of the interaction energies and the Generalized Born solvation energy for the MD trajectories of the complexes Ras-point mutated 3<sub>10</sub>-HBS RB3 peptides.

|                                                           | First Peptide      | Second Peptide     | Third Peptide     |
|-----------------------------------------------------------|--------------------|--------------------|-------------------|
| Point mutation                                            | T1184R             | T1184M             | D1185W            |
| $\Delta G_{\text{binding}}$ – average interaction energy  | -98.85 kcal/mol    | -48.00 kcal/mol    | -98.57 kcal/mol   |
| $\Delta G_{\text{binding}}$ – average GB solvation energy | 9.36 kcal/mol      | -44.76 kcal/mol    | -4.93 kcal/mol    |
|                                                           | Fourth Peptide     | Fifth Peptide      | Sixth Peptide     |
| Point mutation                                            | D1185Y             | D1185F             | D1185L            |
| $\Delta G_{\text{binding}}$ – average interaction energy  | -101.10 kcal/mol   | -84.63 kcal/mol    | -78.69 kcal/mol   |
| $\Delta G_{\text{binding}}$ – average GB solvation energy | -1.38 kcal/mol     | -10.19 kcal/mol    | -3.38 kcal/mol    |
|                                                           | Seventh Peptide    | Eighth Peptide     | Ninth Peptide     |
| Point mutation                                            | F1188R             | F1188H             | I1189M            |
| $\Delta G_{\text{binding}}$ – average interaction energy  | -47.97 kcal/mol    | -8.58 kcal/mol     | -34.55 kcal/mol   |
| $\Delta G_{\text{binding}}$ – average GB solvation energy | -39.52 kcal/mol    | -60.99 kcal/mol    | -48.57 kcal/mol   |
|                                                           | Tenth Peptide      | Eleventh Peptide   | Twelfth Peptide   |
| Point mutation                                            | E1190H             | E1191I             | E1191L            |
| $\Delta G_{\text{binding}}$ – average interaction energy  | -36.69 kcal/mol    | -44.44 kcal/mol    | -53.27 kcal/mol   |
| $\Delta G_{\text{binding}}$ – average GB solvation energy | -36.68 kcal/mol    | -34.21 kcal/mol    | -41.85 kcal/mol   |
|                                                           | Thirteenth Peptide | Fourteenth Peptide | Fifteenth Peptide |
| Point mutation                                            | E1191V             | E1191T             | T1193R            |
| $\Delta G_{\text{binding}}$ – average interaction energy  | -53.11 kcal/mol    | -42.78 kcal/mol    | -45.44 kcal/mol   |
| $\Delta G_{\text{binding}}$ – average GB solvation energy | -41.30 kcal/mol    | -41.72 kcal/mol    | -44.74 kcal/mol   |

| Sixteenth Peptide                                         |                 |
|-----------------------------------------------------------|-----------------|
| Point mutation                                            | T1193N          |
| $\Delta G_{\text{binding}}$ – average interaction energy  | -51.05 kcal/mol |
| $\Delta G_{\text{binding}}$ – average GB solvation energy | -46.10 kcal/mol |

**Table S4.** RMSD plots of 100 ns-long MD simulations performed on Ras protein in complex with the sixteen point-mutated 3<sub>10</sub>-HBS RB3 peptides

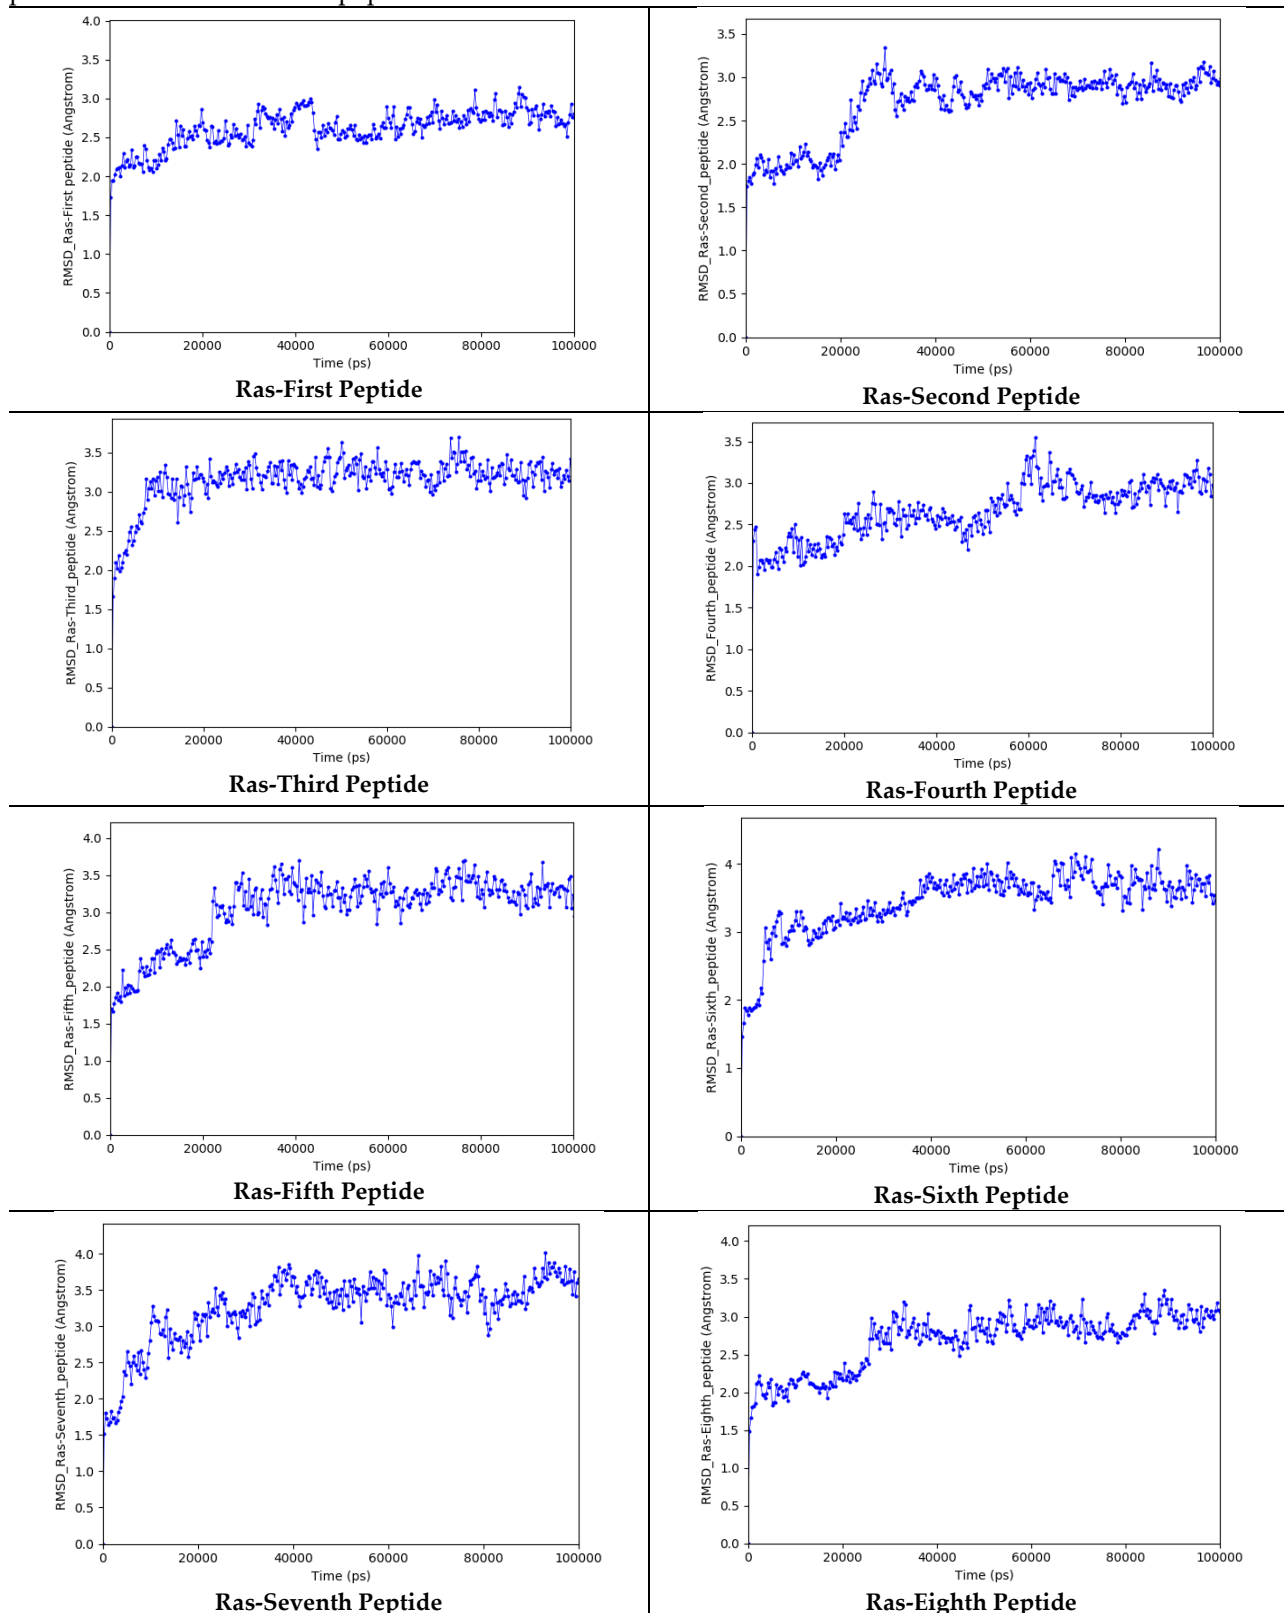

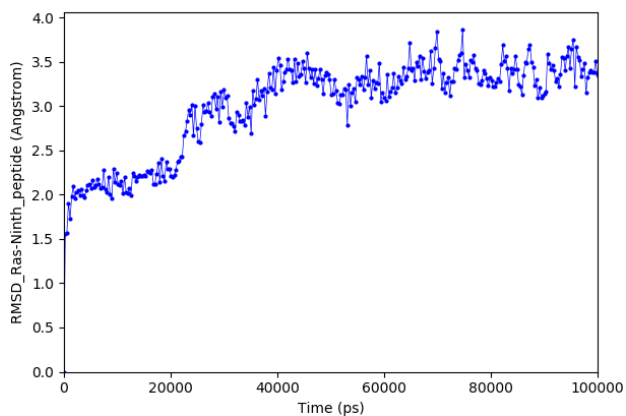

**Ras-Ninth Peptide**

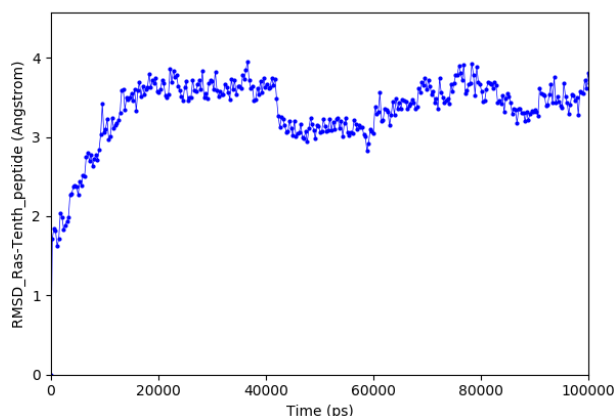

**Ras-Tenth Peptide**

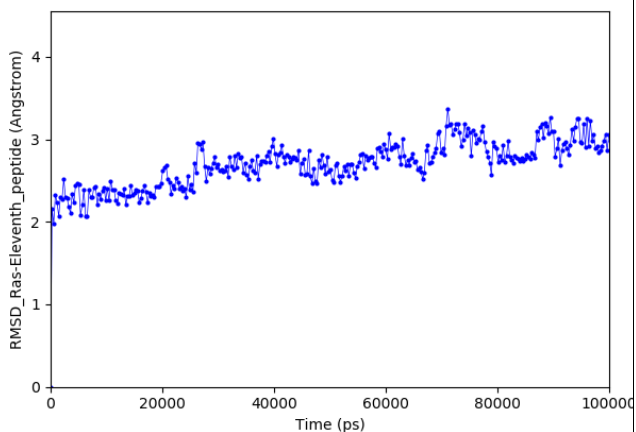

**Ras-Eleventh Peptide**

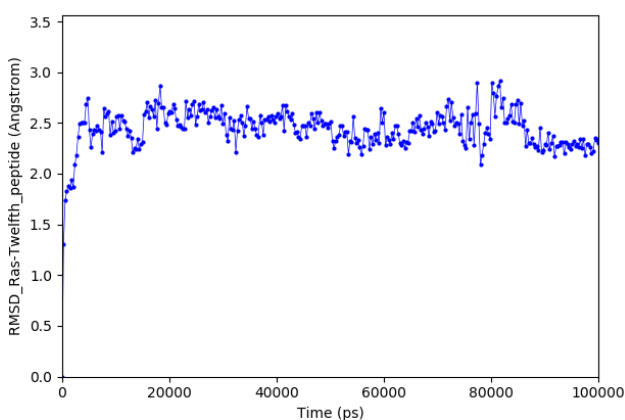

**Ras-Twelfth Peptide**

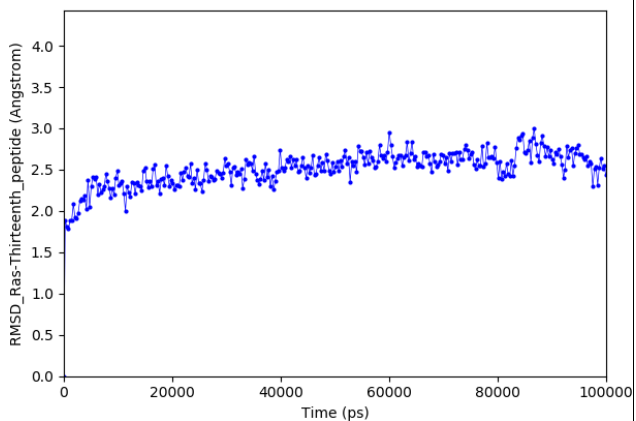

**Ras-Thirteenth Peptide**

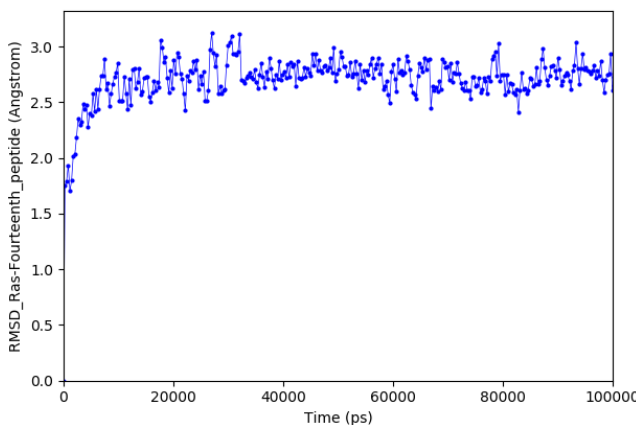

**Ras-Fourteenth Peptide**

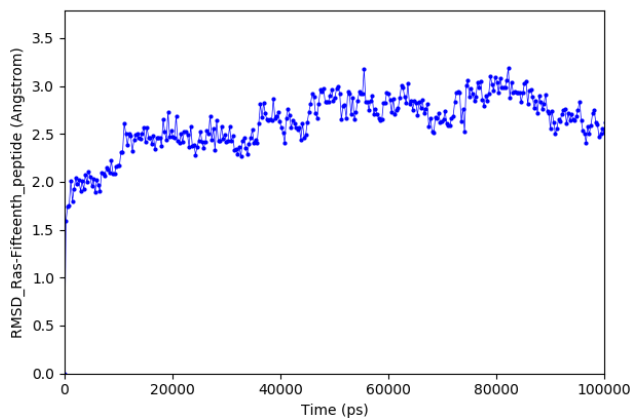

**Ras-Fifteenth Peptide**

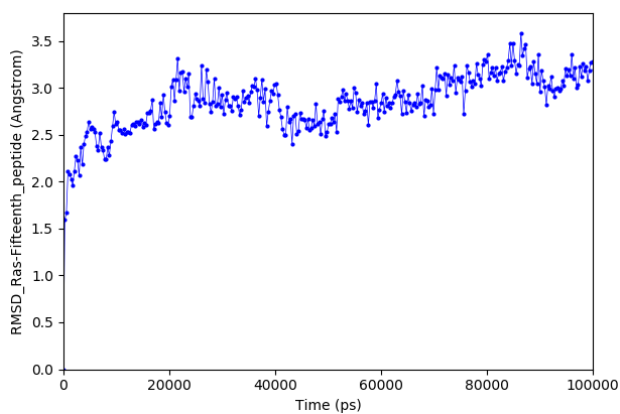

**Ras-Sixteenth Peptide**

**Table S5.**  $\Delta G_{\text{binding}}$  average values of the interaction energies and the Generalized Born solvation energy for the MD trajectories of the complexes Ras-combinatorial peptides.

| First Peptide                                             |                  | Third Peptide         | Eleventh Peptide     |
|-----------------------------------------------------------|------------------|-----------------------|----------------------|
| Peptide sequence                                          | YLGMYLRWLVRMELGR | YLGMYLRYLVRMELGR      | YLGMYLRFLVRMEVGR     |
| $\Delta G_{\text{binding}}$ – average interaction energy  | -217.54 kcal/mol | -251.32 kcal/mol      | -233.65 kcal/mol     |
| $\Delta G_{\text{binding}}$ – average GB solvation energy | 134.08 kcal/mol  | 154.52 kcal/mol       | 142.26 kcal/mol      |
| Twelfth Peptide                                           |                  | Fifteenth Peptide     | Sixteenth Peptide    |
| Peptide sequence                                          | YLGMYLRLLVRMEVGR | YLGMYLMFLVRMEVGR      | YLGMYLMLLVRMEVGR     |
| $\Delta G_{\text{binding}}$ – average interaction energy  | -252.46 kcal/mol | -176.32 kcal/mol      | -166.15 kcal/mol     |
| $\Delta G_{\text{binding}}$ – average GB solvation energy | 159.96 kcal/mol  | 96.53 kcal/mol        | 73.61 kcal/mol       |
| Eighteenth Peptide                                        |                  | Nineteenth Peptide    | Twentieth Peptide    |
| Peptide sequence                                          | YLGMYLRYLVRMETGR | YLGMYLRFLVRMETGR      | YLGMYLRLLVRMETGR     |
| $\Delta G_{\text{binding}}$ – average interaction energy  | -283.21 kcal/mol | -262.47 kcal/mol      | -217.80 kcal/mol     |
| $\Delta G_{\text{binding}}$ – average GB solvation energy | 182.87 kcal/mol  | 159.85 kcal/mol       | 129.08 kcal/mol      |
| Twenty-third Peptide                                      |                  | Twenty-fourth Peptide | Twenty-fifth Peptide |
| Peptide sequence                                          | YLGMYLMFLVRMETGR | YLGMYLMLLVRMETGR      | YLGMYLRWLVRMELGN     |
| $\Delta G_{\text{binding}}$ – average interaction energy  | -195.79 kcal/mol | -163.02 kcal/mol      | -153.99 kcal/mol     |
| $\Delta G_{\text{binding}}$ – average GB solvation energy | 110.27 kcal/mol  | 80.71 kcal/mol        | 56.75 kcal/mol       |
| Twenty-ninth Peptide                                      |                  | Forty-second Peptide  | Forty-third Peptide  |
| Peptide sequence                                          | YLGMYLRFLVRMELGN | YLGMYLRYLVRMETGN      | YLGMYLRFLVRMETGN     |
| $\Delta G_{\text{binding}}$ – average interaction energy  | -174.73 kcal/mol | -194.94 kcal/mol      | -247.51 kcal/mol     |
| $\Delta G_{\text{binding}}$ – average GB solvation energy | 88.17 kcal/mol   | 105.36 kcal/mol       | 124.01 kcal/mol      |
| Forty-fourth Peptide                                      |                  | Forty-fifth Peptide   | Forty-eighth Peptide |
| Peptide sequence                                          | YLGMYLRLLVRMETGN | YLGMYLMWLVRMETGN      | YLGMYLMLLVRMETGN     |
| $\Delta G_{\text{binding}}$ – average interaction energy  | -219.53 kcal/mol | -150.62 kcal/mol      | -145.62 kcal/mol     |
| $\Delta G_{\text{binding}}$ – average GB solvation energy | 123.22 kcal/mol  | 64.59 kcal/mol        | 53.81 kcal/mol       |

**Table S6.** RMSD plots of 100 ns-long MD simulations performed on Ras protein in complex with the selected eighteen  $3_{10}$ -HBS RB3 combinatorial peptides

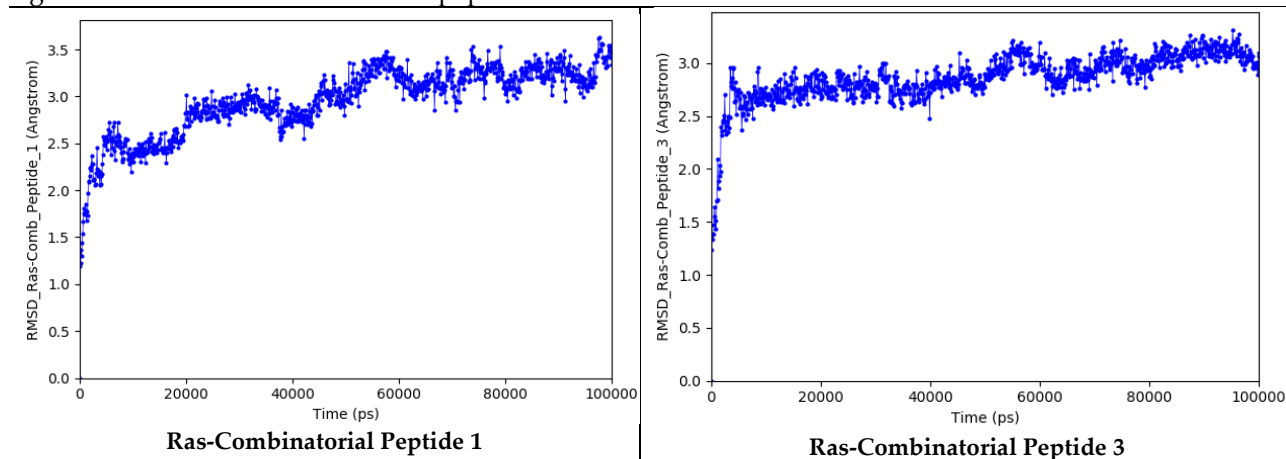

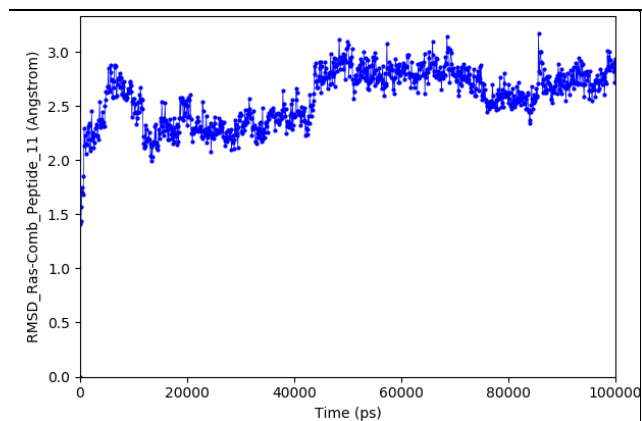

**Ras-Combinatorial Peptide 11**

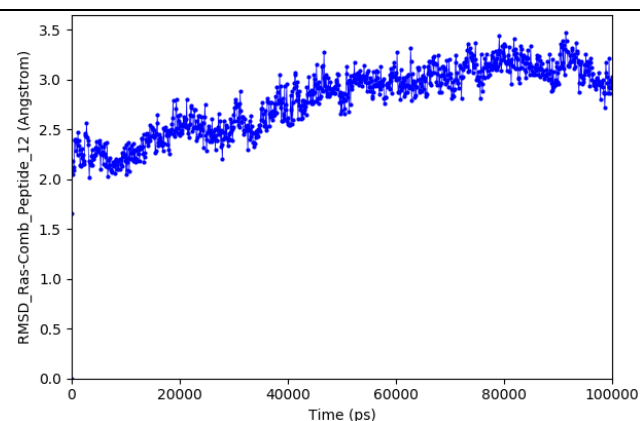

**Ras-Combinatorial Peptide 12**

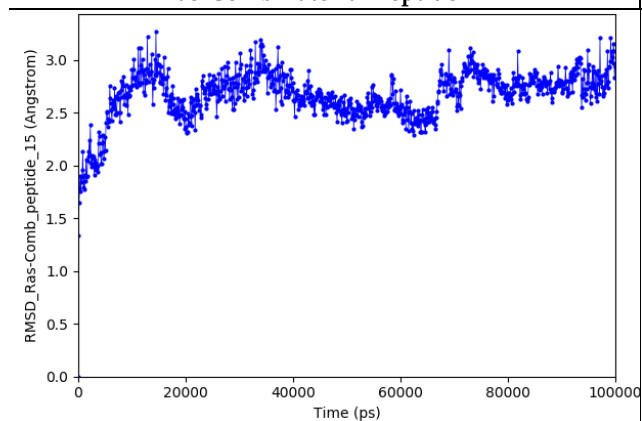

**Ras-Combinatorial Peptide 15**

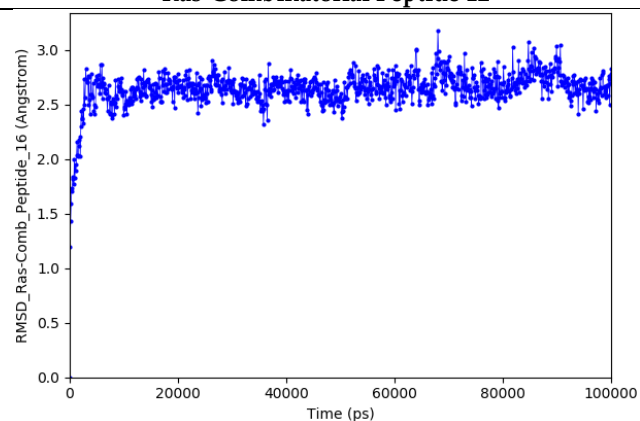

**Ras-Combinatorial Peptide 16**

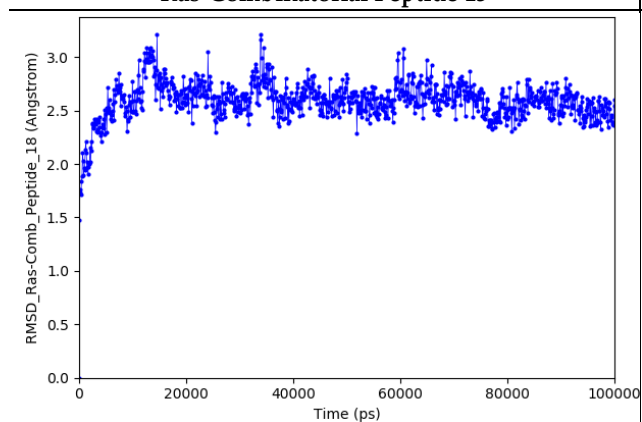

**Ras-Combinatorial Peptide 18**

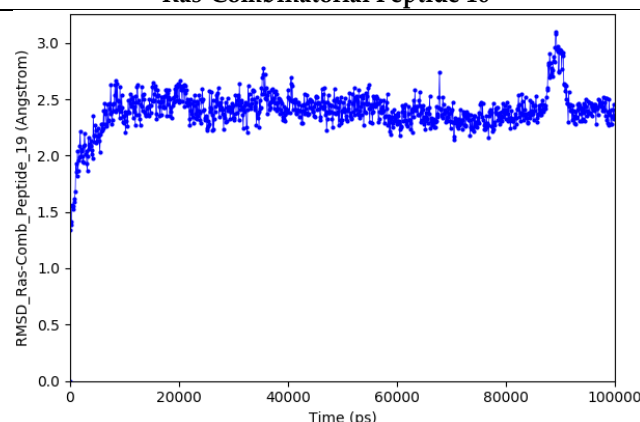

**Ras-Combinatorial Peptide 19**

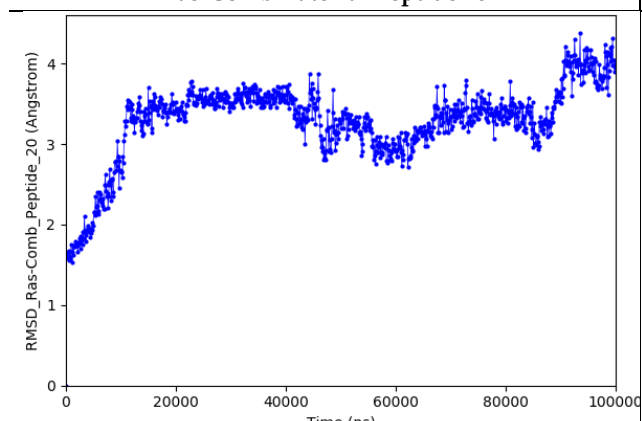

**Ras-Combinatorial Peptide 20**

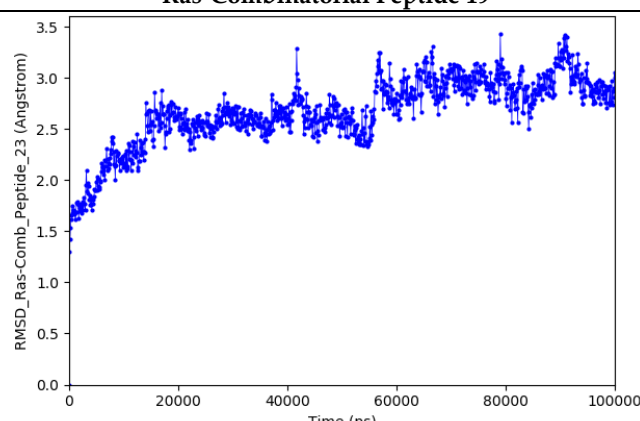

**Ras-Combinatorial Peptide 23**



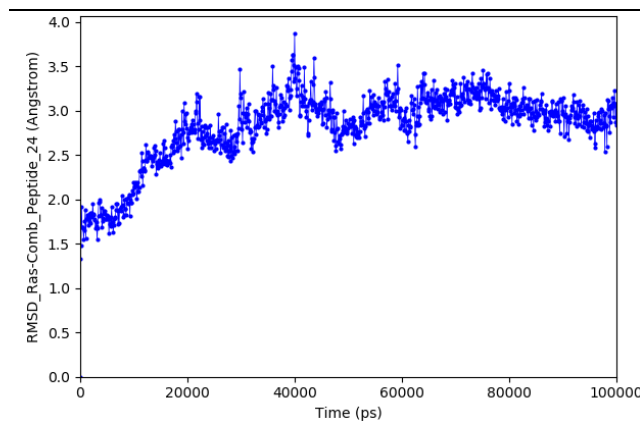

**Ras-Combinatorial Peptide 24**

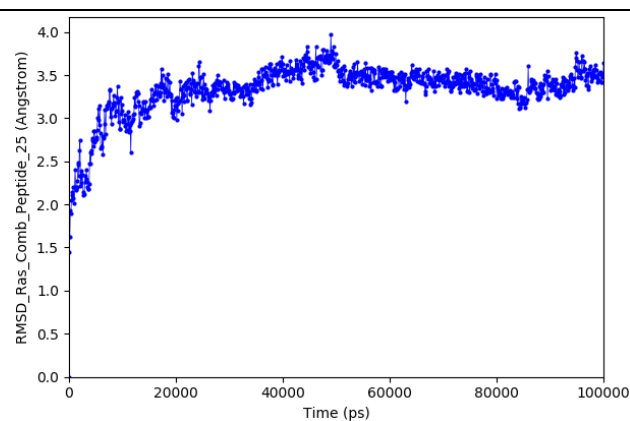

**Ras-Combinatorial Peptide 25**

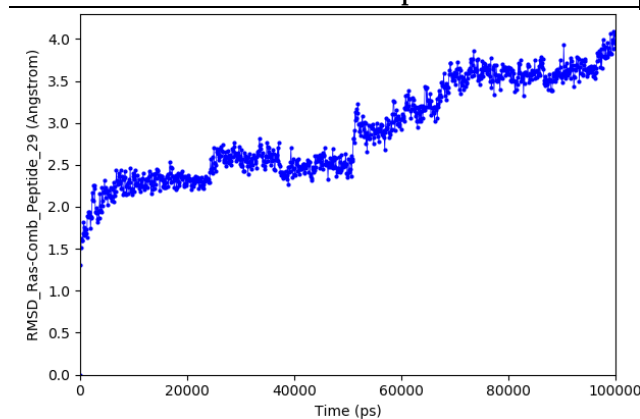

**Ras-Combinatorial Peptide 29**

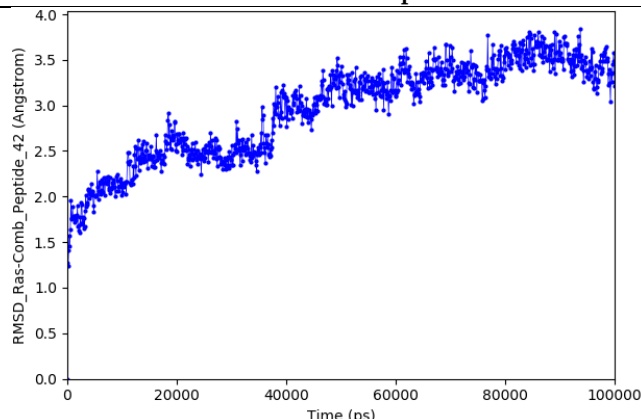

**Ras-Combinatorial Peptide 42**

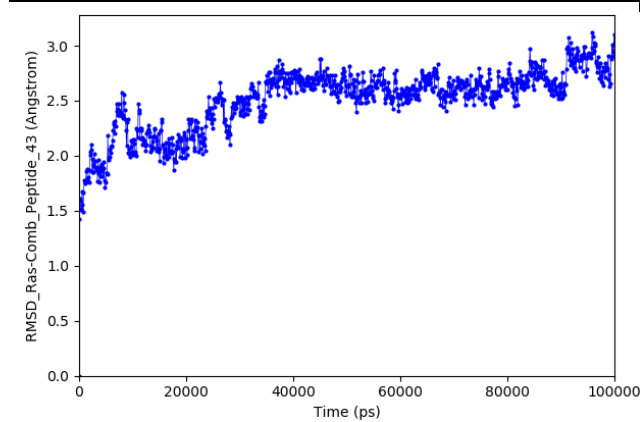

**Ras-Combinatorial Peptide 43**

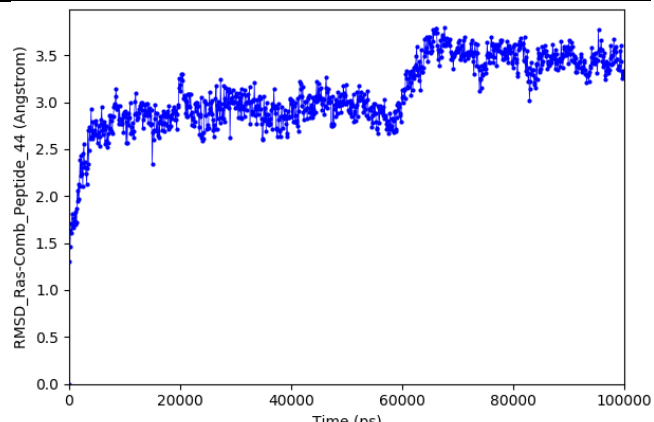

**Ras-Combinatorial Peptide 44**

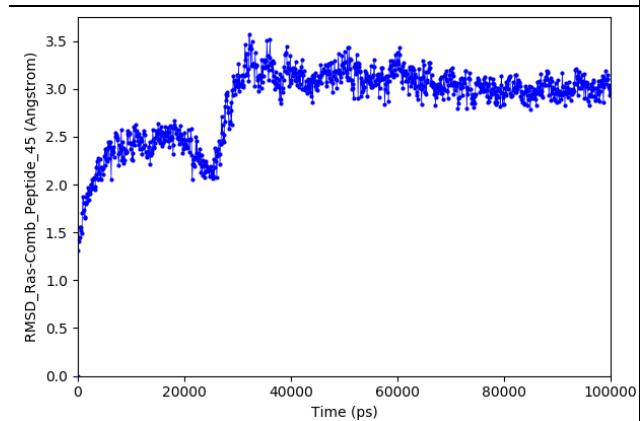

**Ras-Combinatorial Peptide 45**

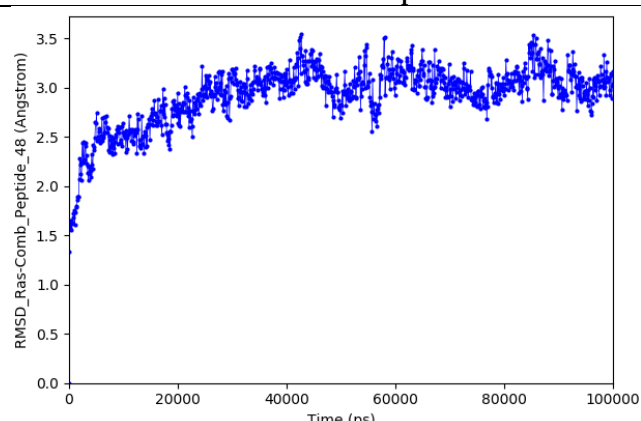

**Ras-Combinatorial Peptide 48**

**Table S7.** The bar charts of protein-ligand interactions for the eighteen 3<sub>10</sub>-HBS RB3 combinatorial peptides (on the left column); the plots illustrating the frequency of interaction occurrences between the combinatorial peptides and Ras protein (on the right column)

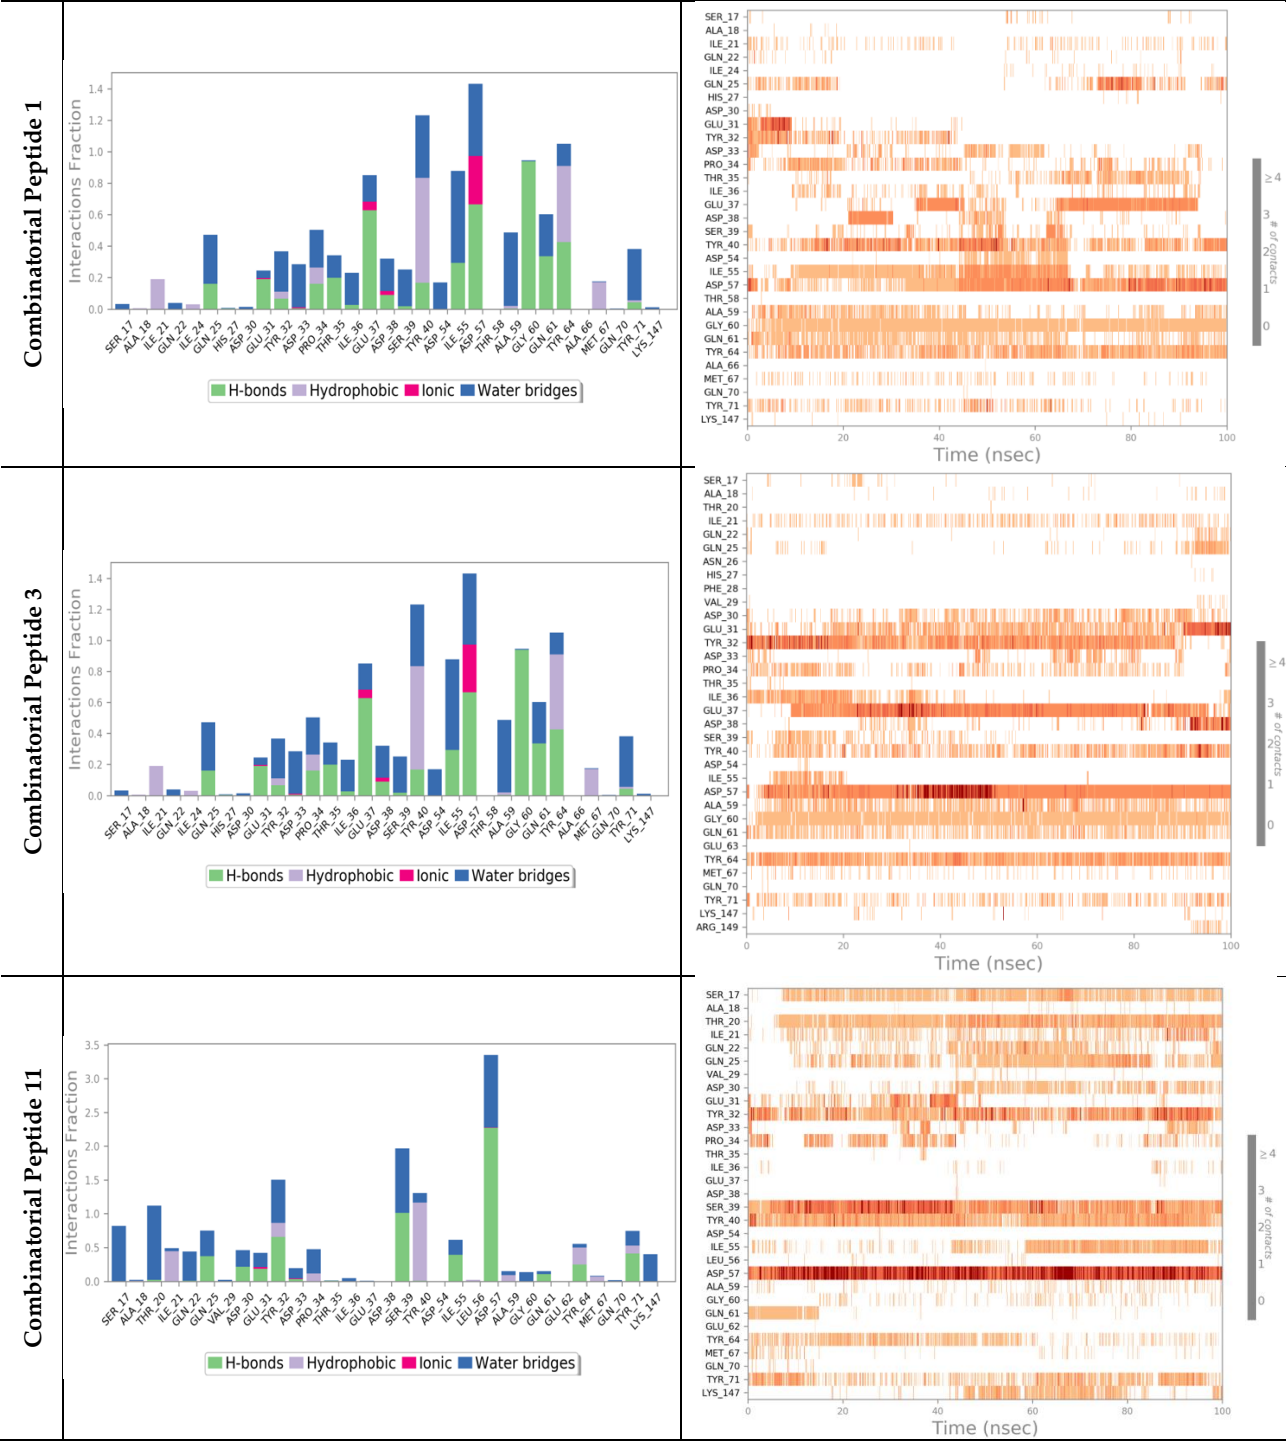

Combinatorial Peptide 12

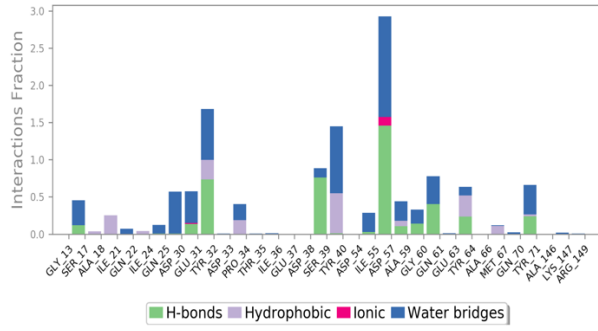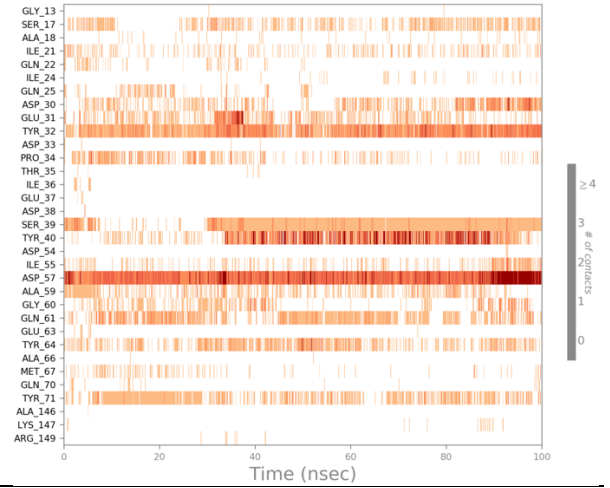

Combinatorial Peptide 15

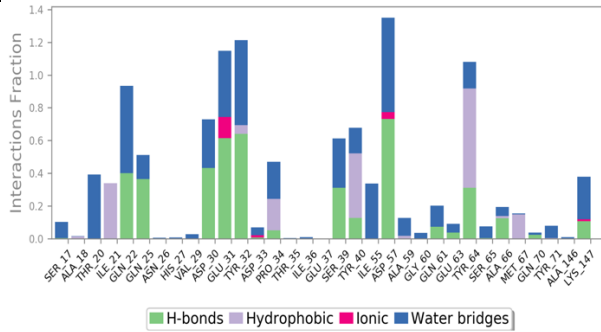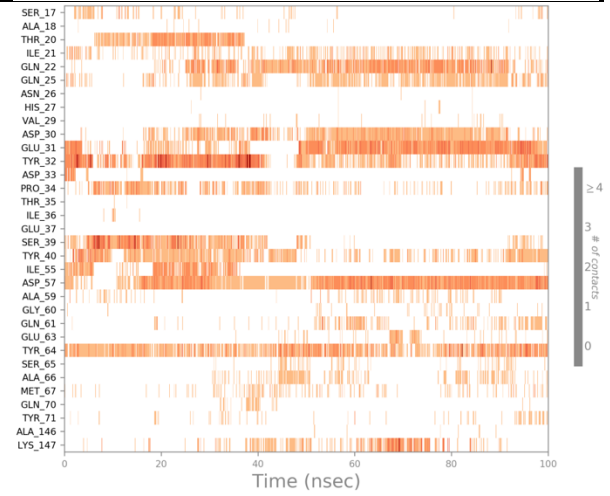

Combinatorial Peptide 16

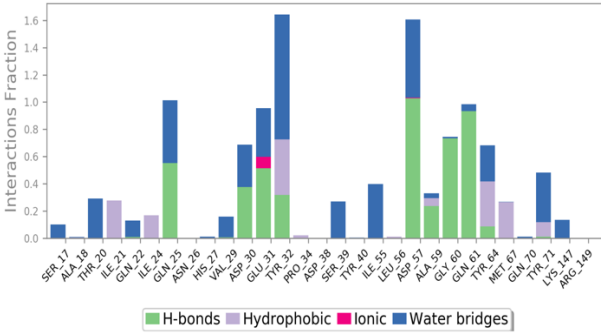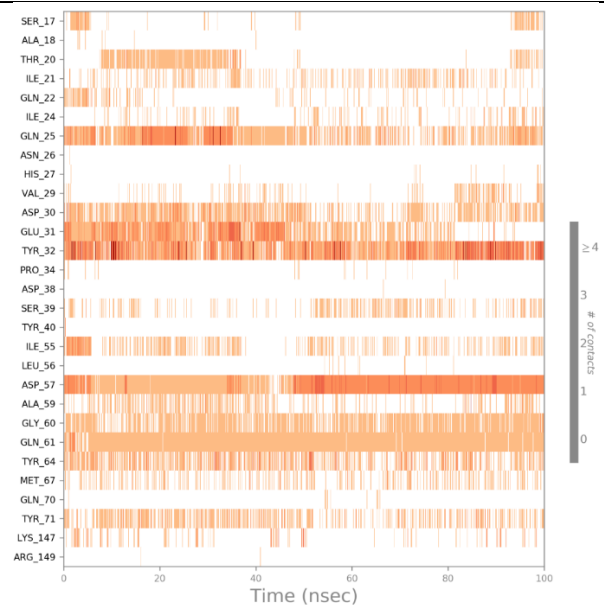

### Combinatorial Peptide 18

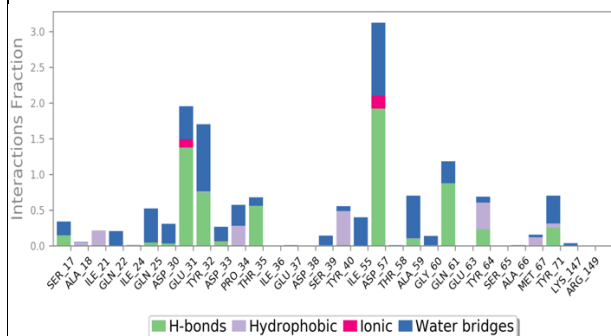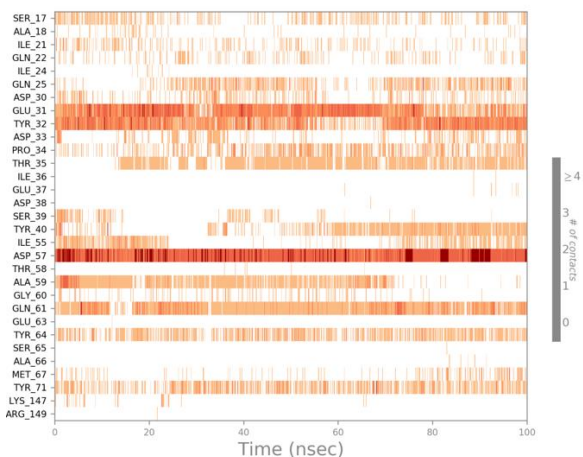

### Combinatorial Peptide 19

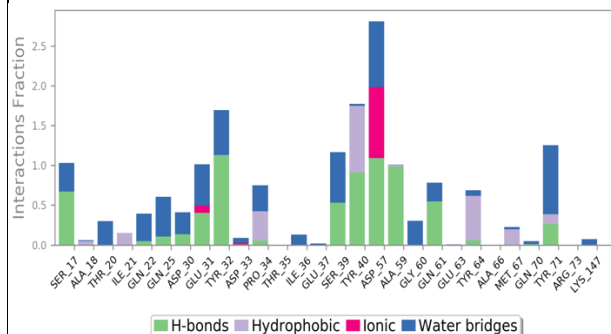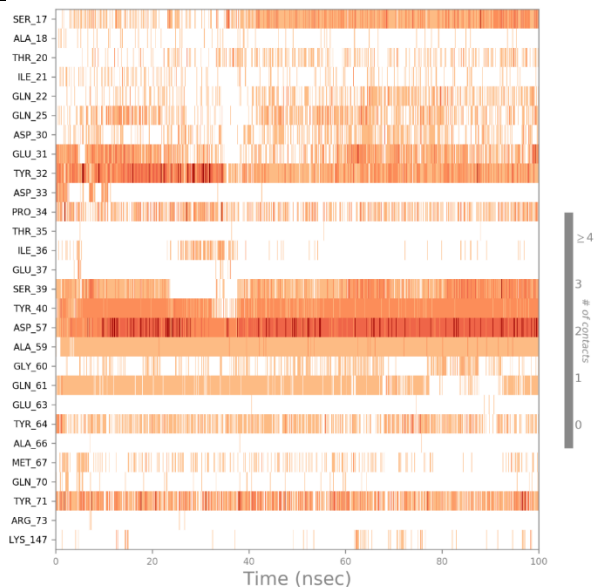

### Combinatorial Peptide 20

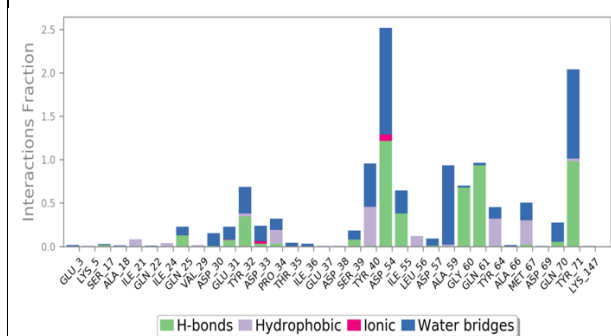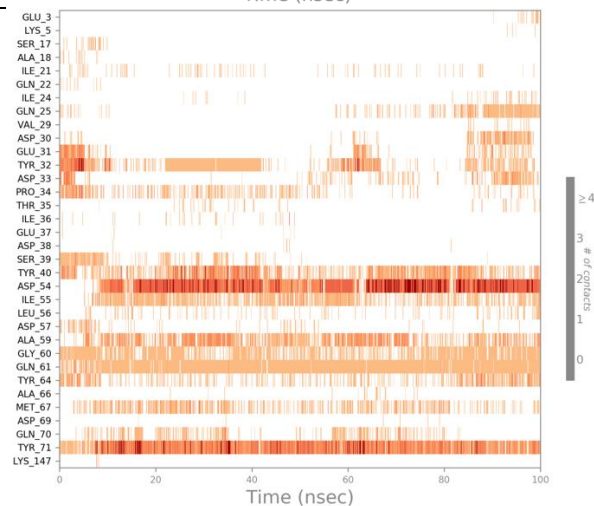

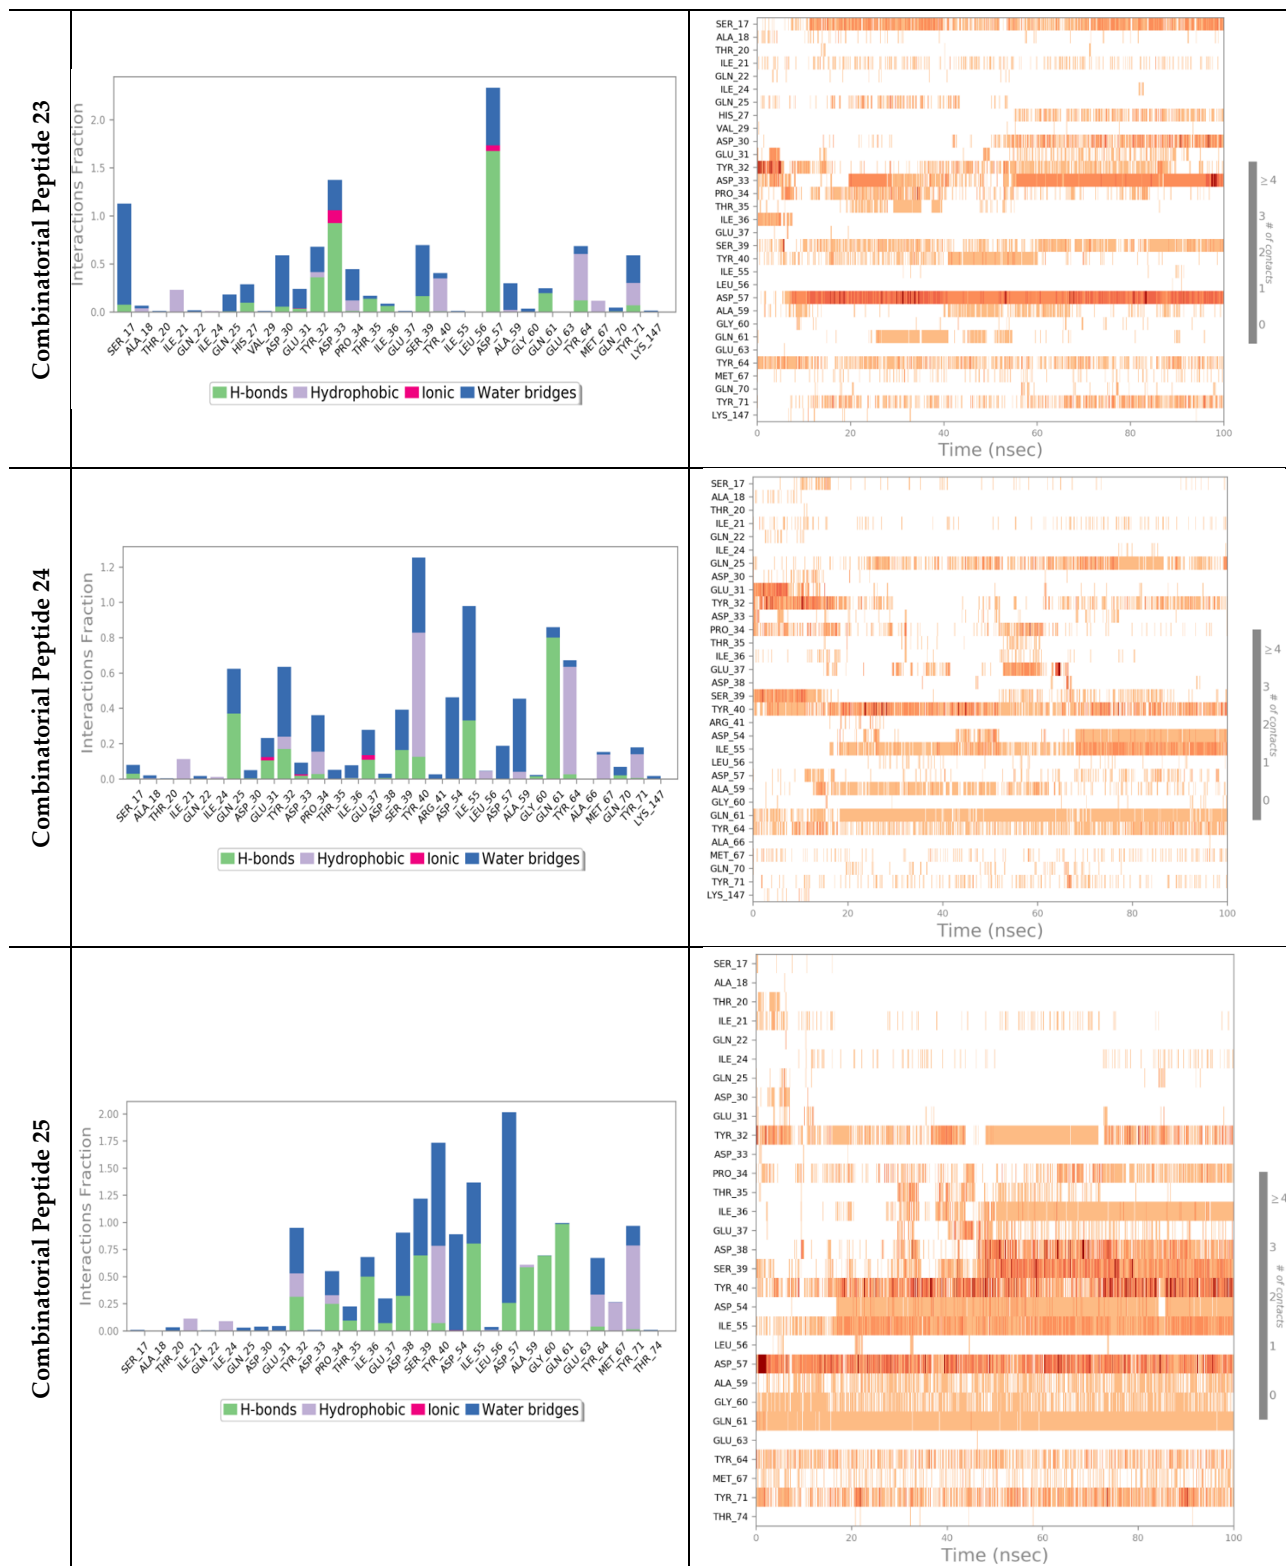

Combinatorial Peptide 29

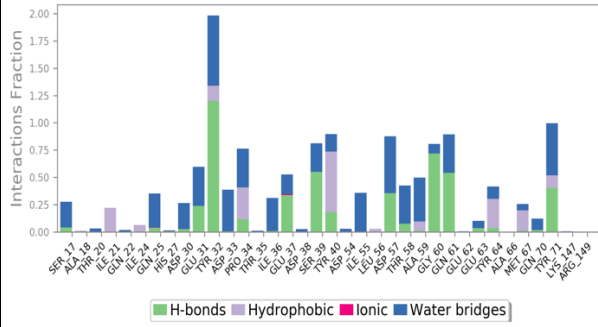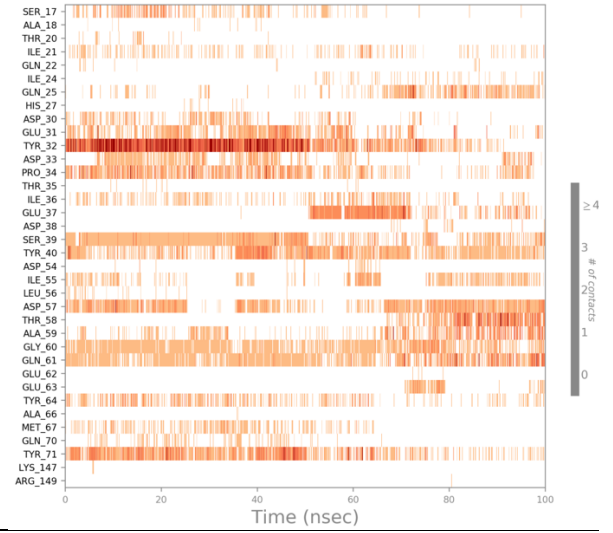

Combinatorial Peptide 42

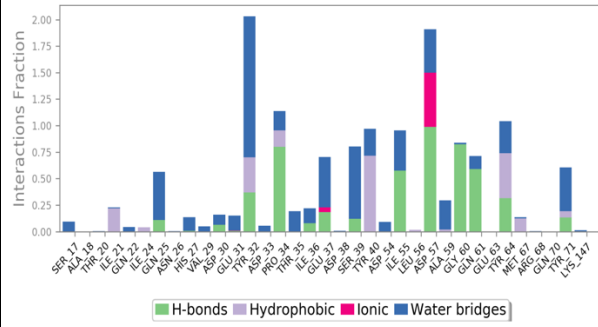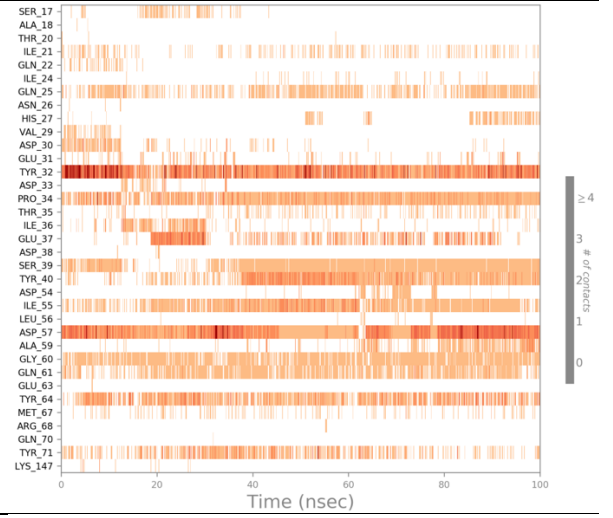

Combinatorial Peptide 43

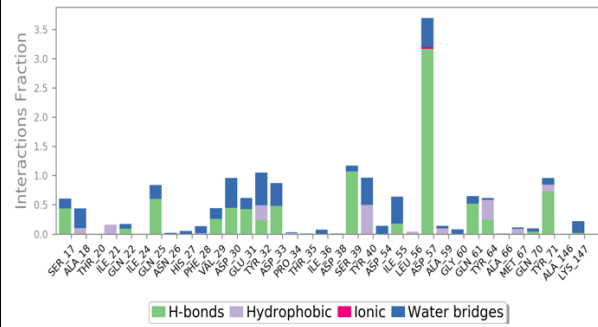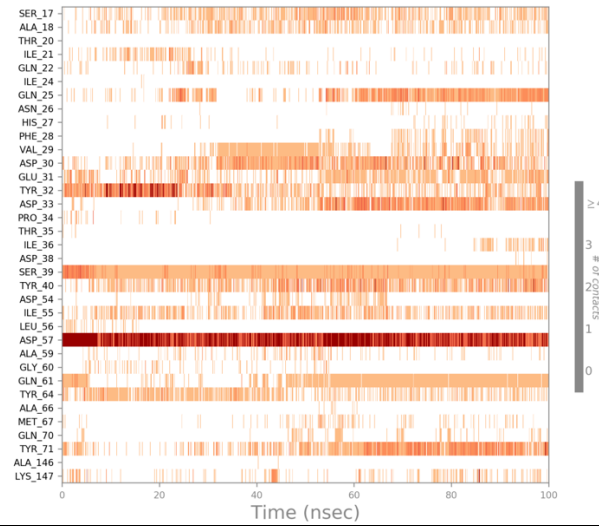



Combinatorial Peptide 44

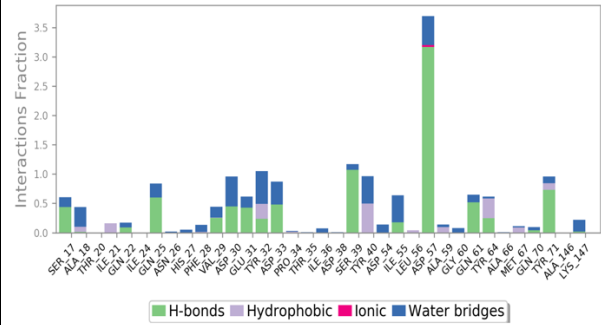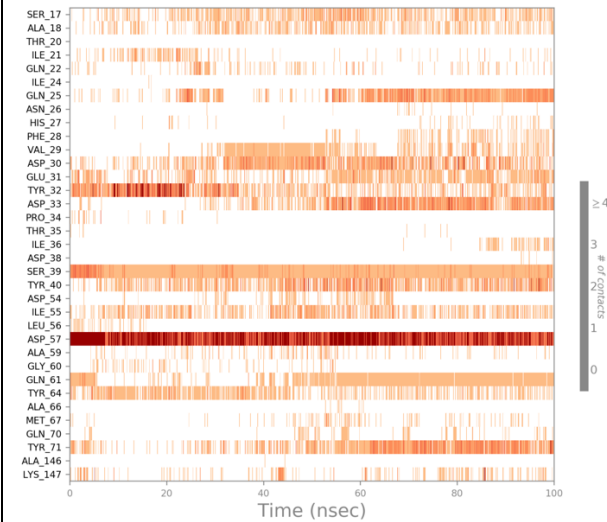

Combinatorial Peptide 45

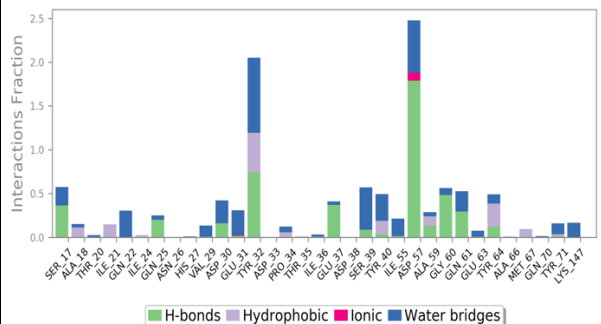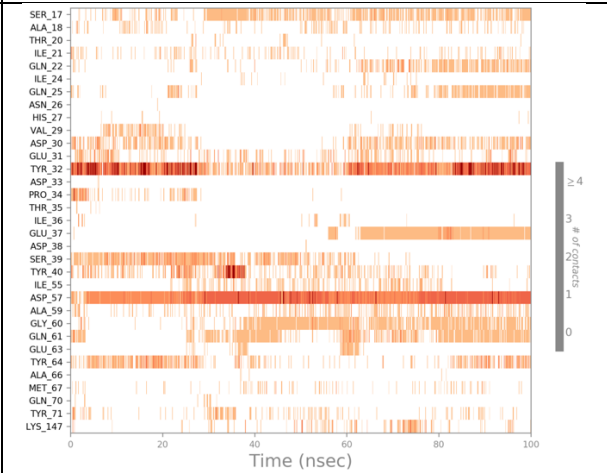

Combinatorial Peptide 48

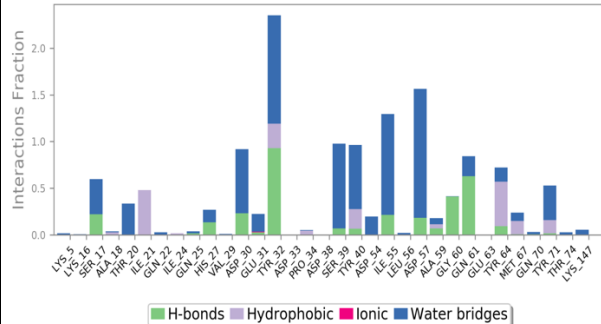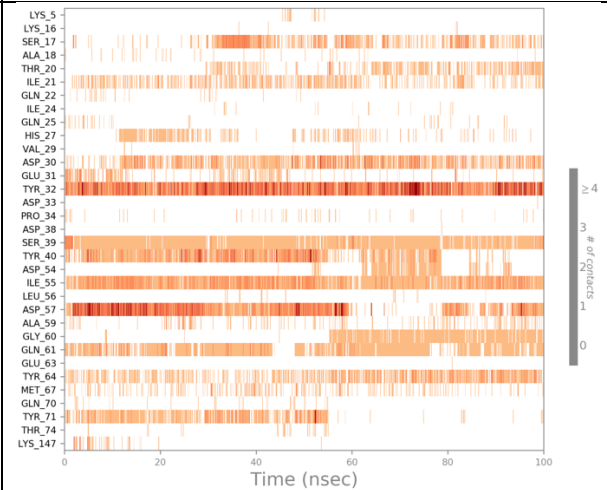

Supplement: s1 [file s1]
